# Supplementary material for: Rhea: a transparent and modular R pipeline for microbial profiling based on 16S rRNA gene amplicons
Source: PeerJ. 2017 Jan 11;5:e2836. doi: 10.7717/peerj.2836 (PMC5234437; doi:10.7717/peerj.2836)
Supplement: Table S2 [file peerj-05-2836-s002.xlsx]

## Sheet: Suppl Table S2
	Richness	Shannon	Shannon.effective	Simpson	Simpson.effective
V1.HFW.CD	95	3.35062	28.52	0.0714863	13.99
V10.HFW.HFD	103	3.87396	48.13	0.0296105	33.77
V11.HFW.HFD	109	3.85294	47.13	0.0319421	31.31
V12.HFW.CD	92	3.56948	35.5	0.0479673	20.85
V13.SPF.CD	101	3.41607	30.45	0.0599788	16.67
V14.SPF.CD	90	3.17877	24.02	0.086212	11.6
V15.SPF.CD	97	3.37269	29.16	0.0667236	14.99
V16.SPF.CD	91	3.28627	26.74	0.0913239	10.95
V17.SPF.CD	95	3.39255	29.74	0.0663509	15.07
V18.SPF.CD	95	3.5912	36.28	0.0445797	22.43
V19.SPF.HFD	99	3.58353	36	0.0481033	20.79
V2.HFW.HFD	113	3.79594	44.52	0.0469633	21.29
V20.SPF.HFD	104	3.4984	33.06	0.053264	18.77
V21.SPF.HFD	94	3.45286	31.59	0.06224	16.07
V22.SPF.HFD	98	3.65806	38.79	0.0398077	25.12
V23.SPF.HFD	99	3.41759	30.5	0.069173	14.46
V24.SPF.HFD	99	3.4053	30.12	0.0742458	13.47
V3.HFW.CD	93	3.15919	23.55	0.0703463	14.22
V4.HFW.HFD	113	3.85162	47.07	0.0332226	30.1
V5.HFW.CD	88	3.42225	30.64	0.0594231	16.83
V6.HFW.HFD	112	3.88008	48.43	0.0319139	31.33
V7.HFW.CD	90	3.40609	30.15	0.0586682	17.05
V8.HFW.HFD	113	3.85455	47.21	0.0361213	27.68
V9.HFW.CD	95	3.36322	28.88	0.0615661	16.24
